# Supplementary material for: Bioinformatics Identification of Prognostic Factors Associated with Breast Cancer
Source: Research Square preprint supplement (doi:10.21203/rs.3.rs-117477/v1), 2020-12-02
Supplement: Supplementary file 1 [file d26ea7ec2d67f224e48deb7d.docx]

**Supplementary Table 4** The selected miRNAs and their target genes.

| **miRNA** | **Genes targeted by miRNA** | **Gene count** |
| --- | --- | --- |
| has-miR-561-3p | RRM2, CEP55 | 2 |
| has-miR-342-3p | RRM2, ANLN | 2 |
| has-miR-381-3p | RRM2, UBE2C | 2 |
| has-miR-3646 | RRM2, NEK2 | 2 |
| has-miR-15b-5p | CEP55, ANLN | 2 |
| has-miR-8077 | ANLN, TOP2A, AURKA | 3 |
| has-miR-4524a-5p | ANLN, KIF2C | 2 |
| has-miR-3120-3p | BIRC5, NEK2 | 2 |
| has-miR-1285-3p | BIRC5, NEK2 | 2 |
| has-miR-6788-5p | NEK2, AURKA | 2 |
